# Supplementary material for: A miniaturized electrochemical assay for homocysteine using screen-printed electrodes with cytochrome c anchored gold nanoparticles
Source: Royal Society of Chemistry journal article supplement (doi:10.1039/c5an00752f), 2015-01-01
Supplement: c5an00752f1.pdf [file c5an00752f1.pdf]

## A miniaturized electrochemical assay for homocysteine using screen-printed electrode with cytochrome c anchored gold nanoparticles

Thangamuthu Madasamy\*, Christian Santschi, Olivier J.F. Martin

Nanophotonics and Metrology laboratory (NAM), Swiss Federal Institute of technology  
Lausanne (EPFL), CH-1015 Lausanne, Switzerland

### Supplementary data

Figure S1

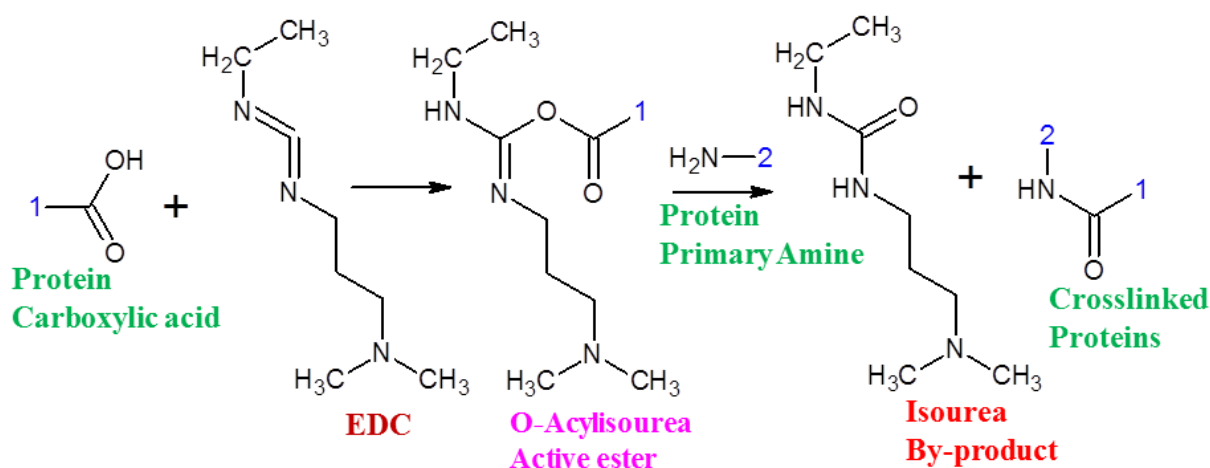

Fig. S1. A mechanism of crosslinking of *cyt c* with EDC.

Figure S2

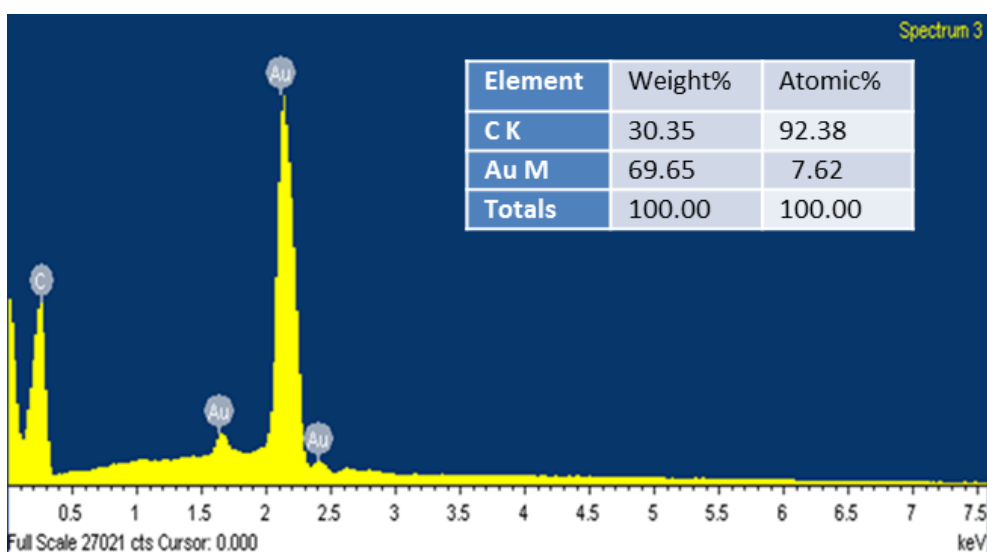

Fig. S2. EDX spectrum of GNP-SPE.

Figure S3

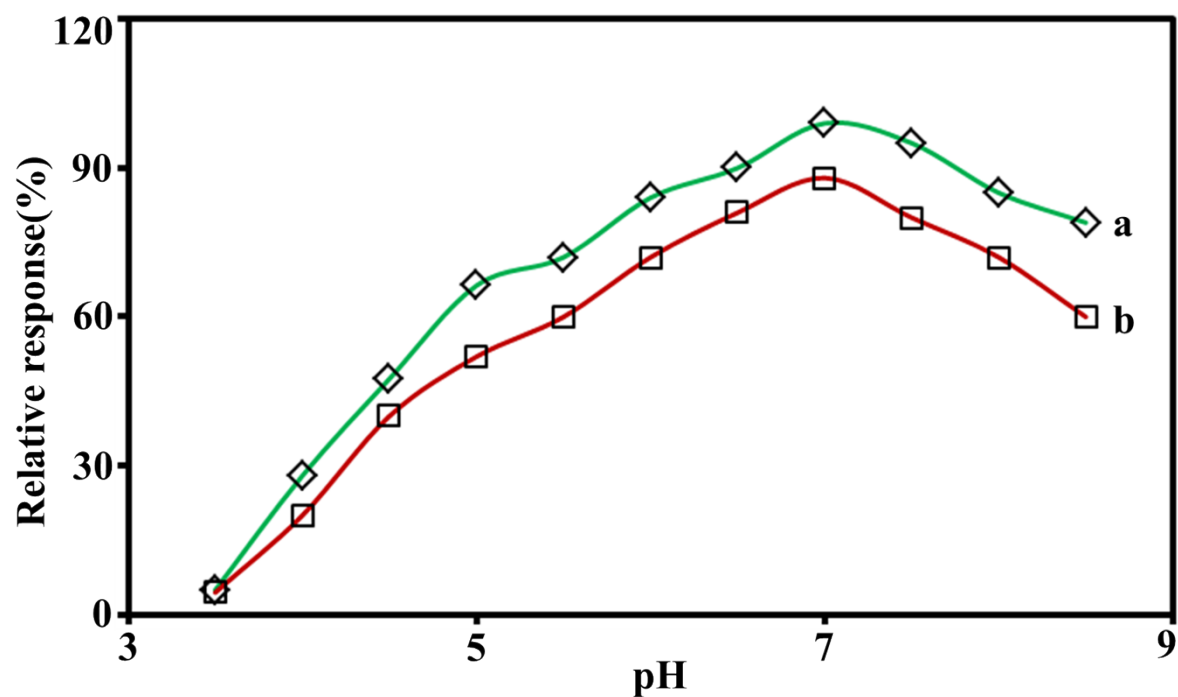

Fig. S3. Effect of pH on the peak current of a) cyt c-GNP-SPE and b) cyt c-SPE in 0.1 M PBS at scan rate 50 mV S<sup>-1</sup>.

Figure S4

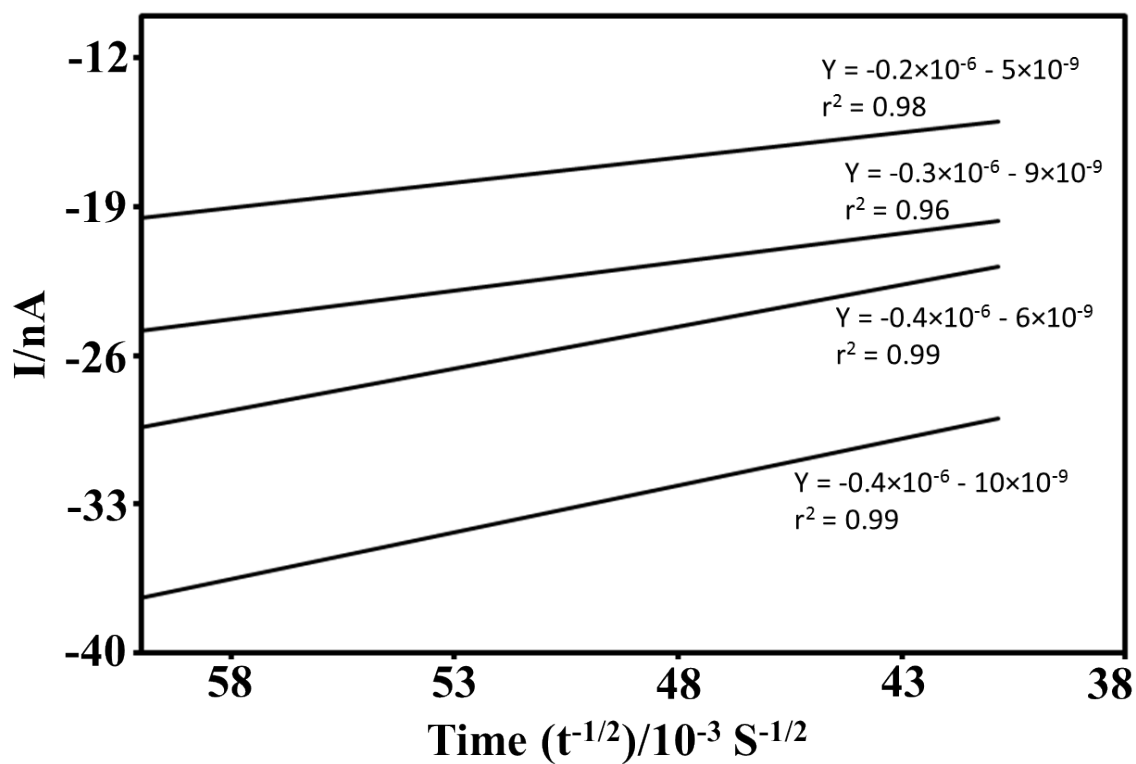

Fig. S4. Cottrell plot obtained for the various HcySH concentrations chronoamperograms.

Figure S5

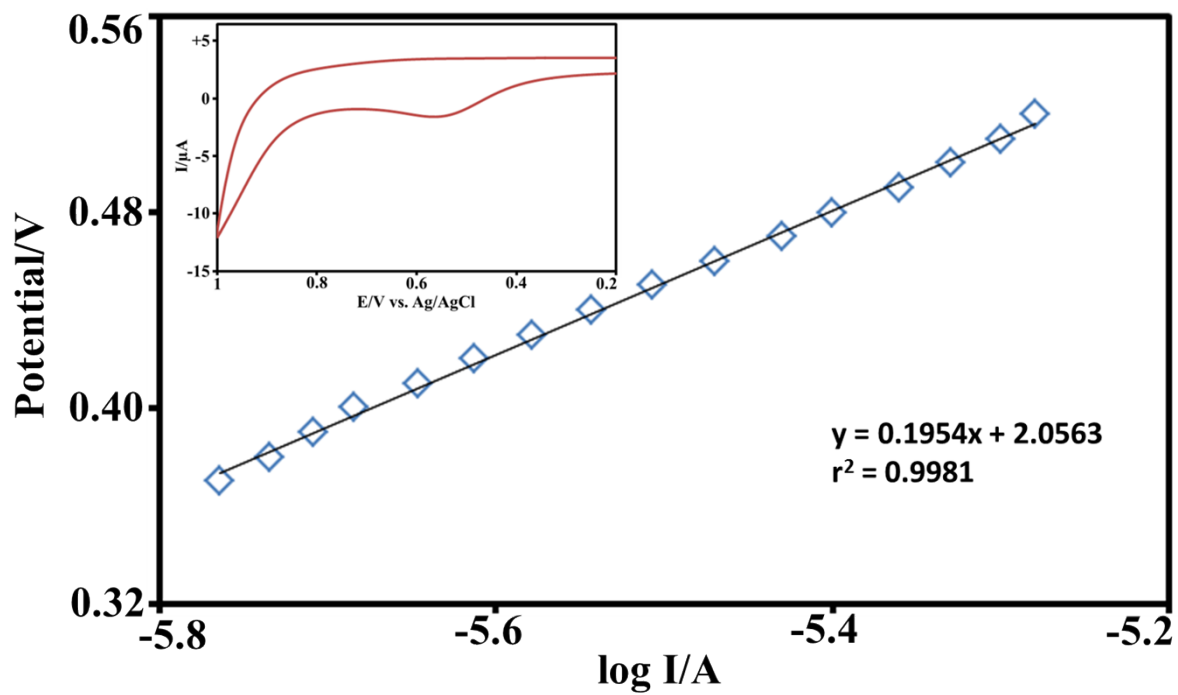

Fig. S5. Tafel plot for the  $100 \mu\text{M L}^{-1}$  HcySH in 0.1 M PBS (pH 7.2) at cyt c-GNP-SPE.
